# Supplementary material for: Temporal Trends in Suicidal Ideation and Attempts Among US Adolescents by Sex and Race/Ethnicity, 1991-2019
Source: PubMed Central journal article supplement (PMC8204211; doi:10.1001/jamanetworkopen.2021.13513), 2021-06-14
Supplement: jamanetwopen-e2113513-s001.pdf [file jamanetwopen-e2113513-s001.pdf]

## Supplementary Online Content

Xiao Y, Cerel J, Mann JJ. Temporal trends in suicidal ideation and attempts among US adolescents by sex and race/ethnicity, 1991-2019. *JAMA Netw Open*. 2021;4(6):e2113513.  
doi:10.1001/jamanetworkopen.2021.13513

**eFigure 1.** Turning Points in Temporal Trends in Suicidal Subgroups and Possible Associated Policy and Societal Factors, 1991-2019

**eFigure 2.** Prevalence of Suicidal Ideation and Suicide Attempts among US Adolescents, by Sex, 1991-2019

**eFigure 3.** Prevalence of Suicidal Ideation and Suicide Attempts among US Adolescents, by Race/ethnicity, 1991-2019

**eFigure 4.** Prevalence of Suicidal Ideation and Suicide Attempts among U.S. Adolescents, by Sex and Race/ethnicity, 1991-2019

**eFigure 5.** Trends in Suicidal Ideation and Suicide Attempts among U.S. Adolescents, by Sex and Race/ethnicity, 1991-2019

This supplementary material has been provided by the authors to give readers additional information about their work.

**eFigure 1.** Turning Points in Temporal Trends in Suicidal Subgroups and Possible Associated Policy and Societal Factors, 1991-2019

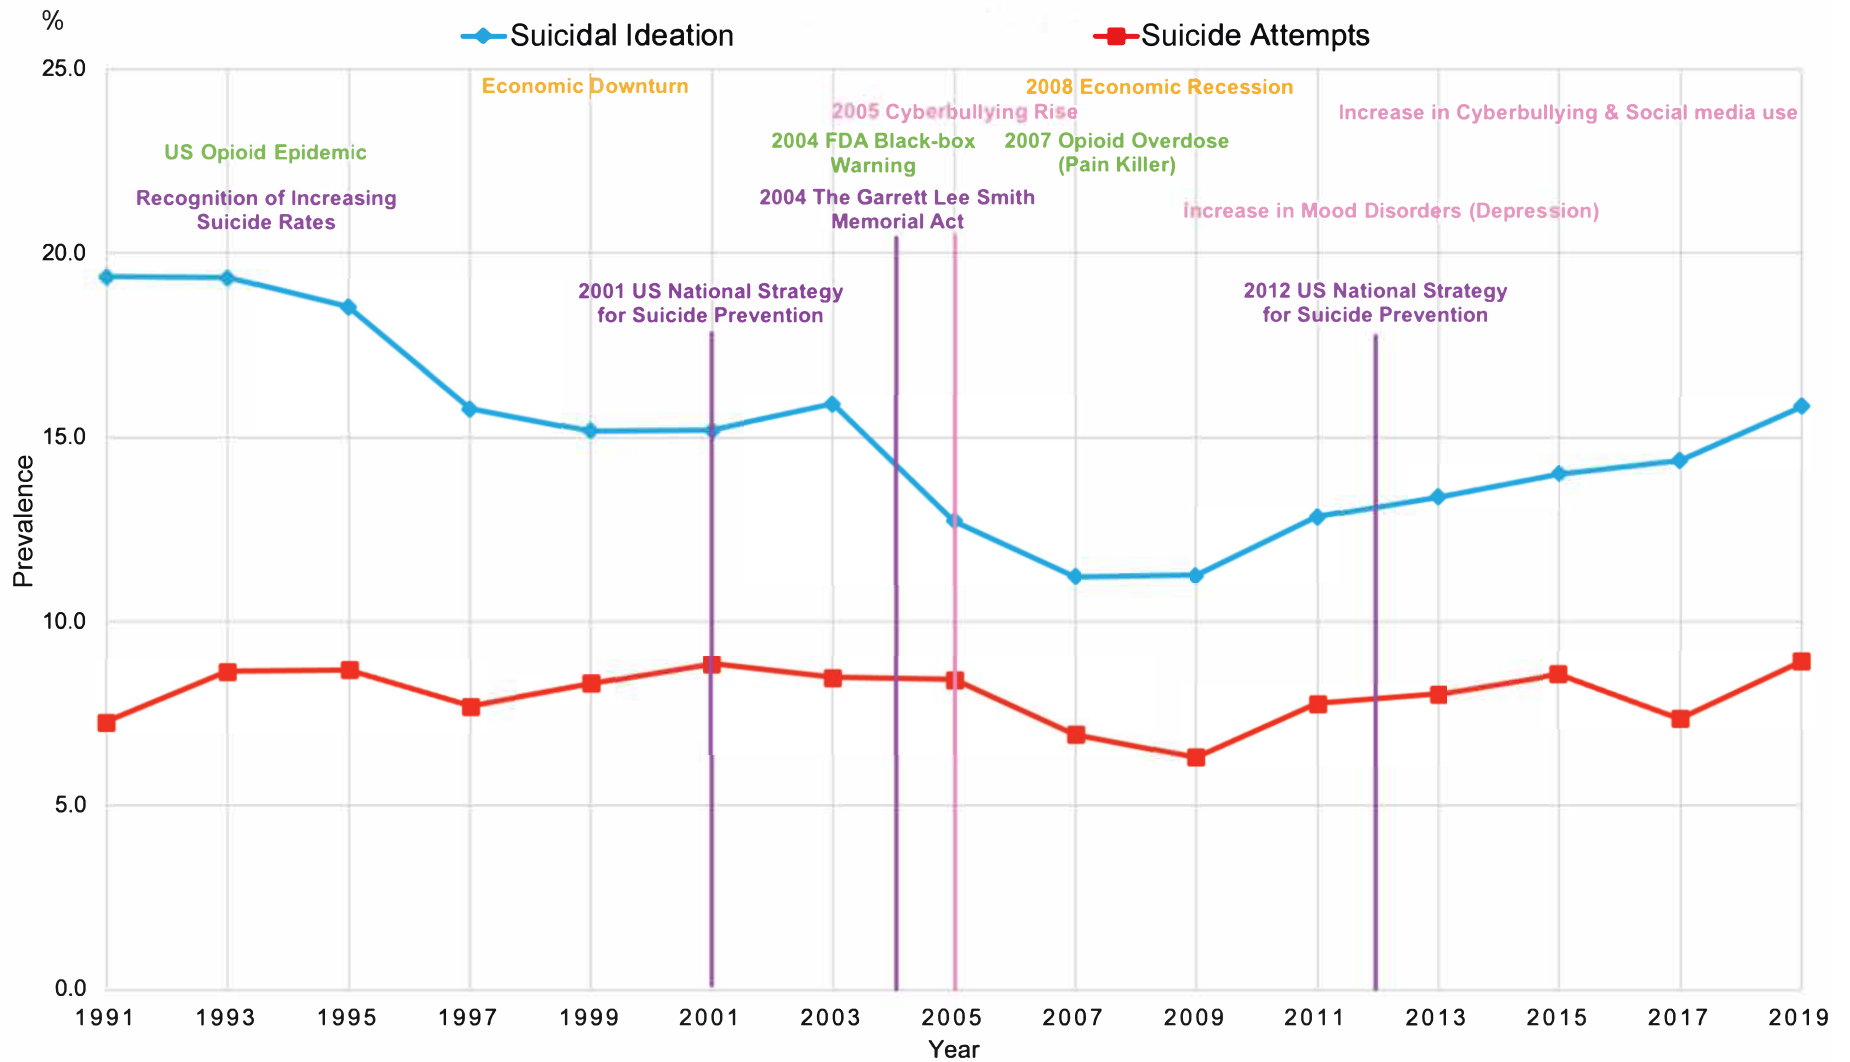

**eFigure 2.** Prevalence of Suicidal Ideation and Suicide Attempts among U.S. Adolescents, by Sex, 1991-2019

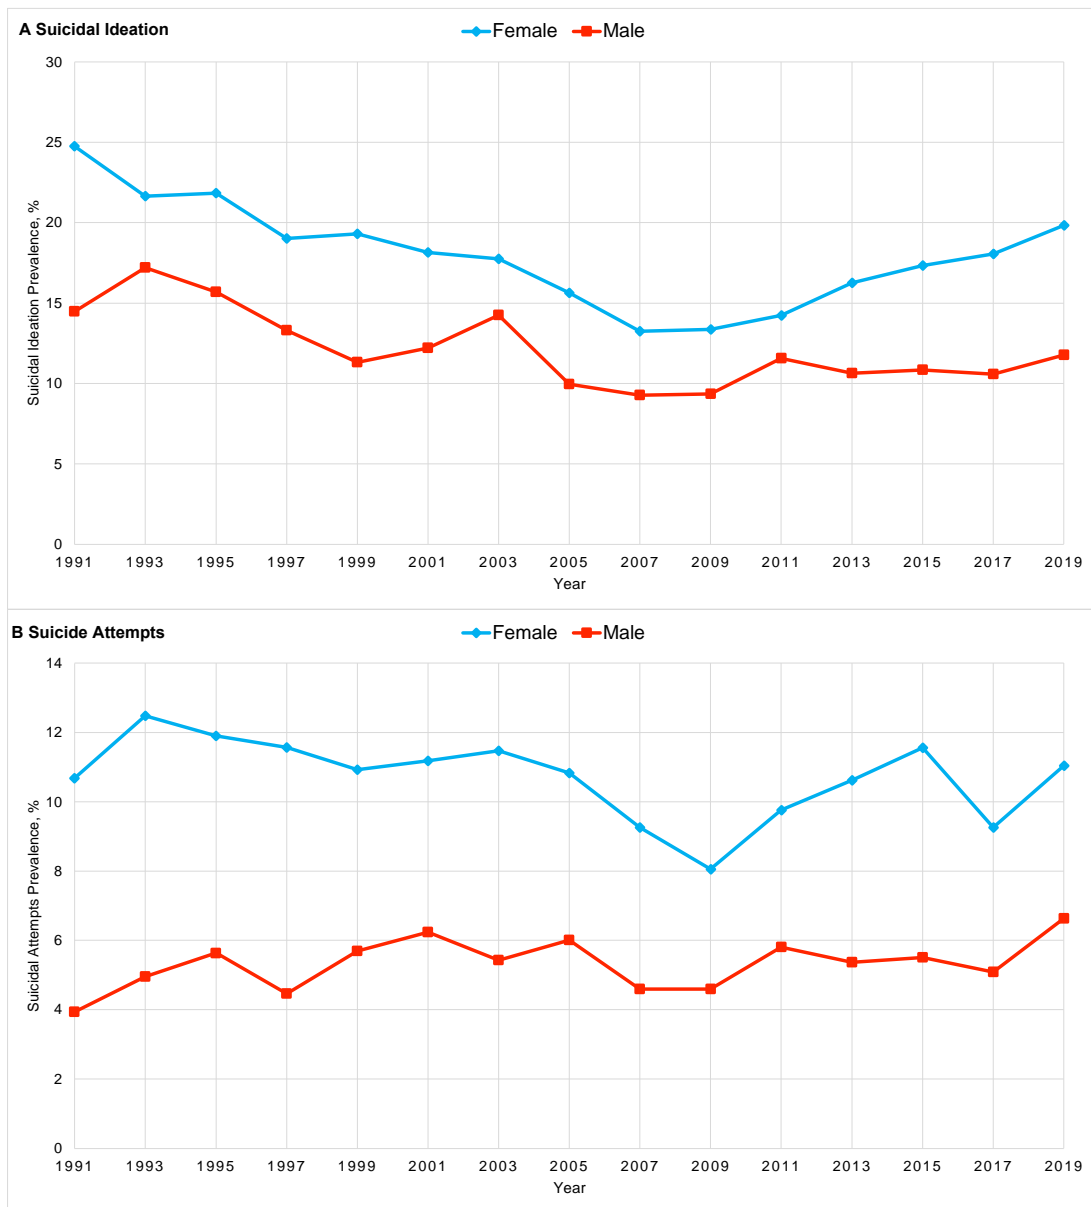

Note. For suicidal ideation, parallel comparisons by sex were not rejected ( $P=.55$ ). For suicide attempts, APCs differed significantly from each other among females and males ( $P=.005$ ).

**eFigure 3.** Prevalence of Suicidal Ideation and Suicide Attempts among U.S. Adolescents, by Race/ethnicity, 1991-2019

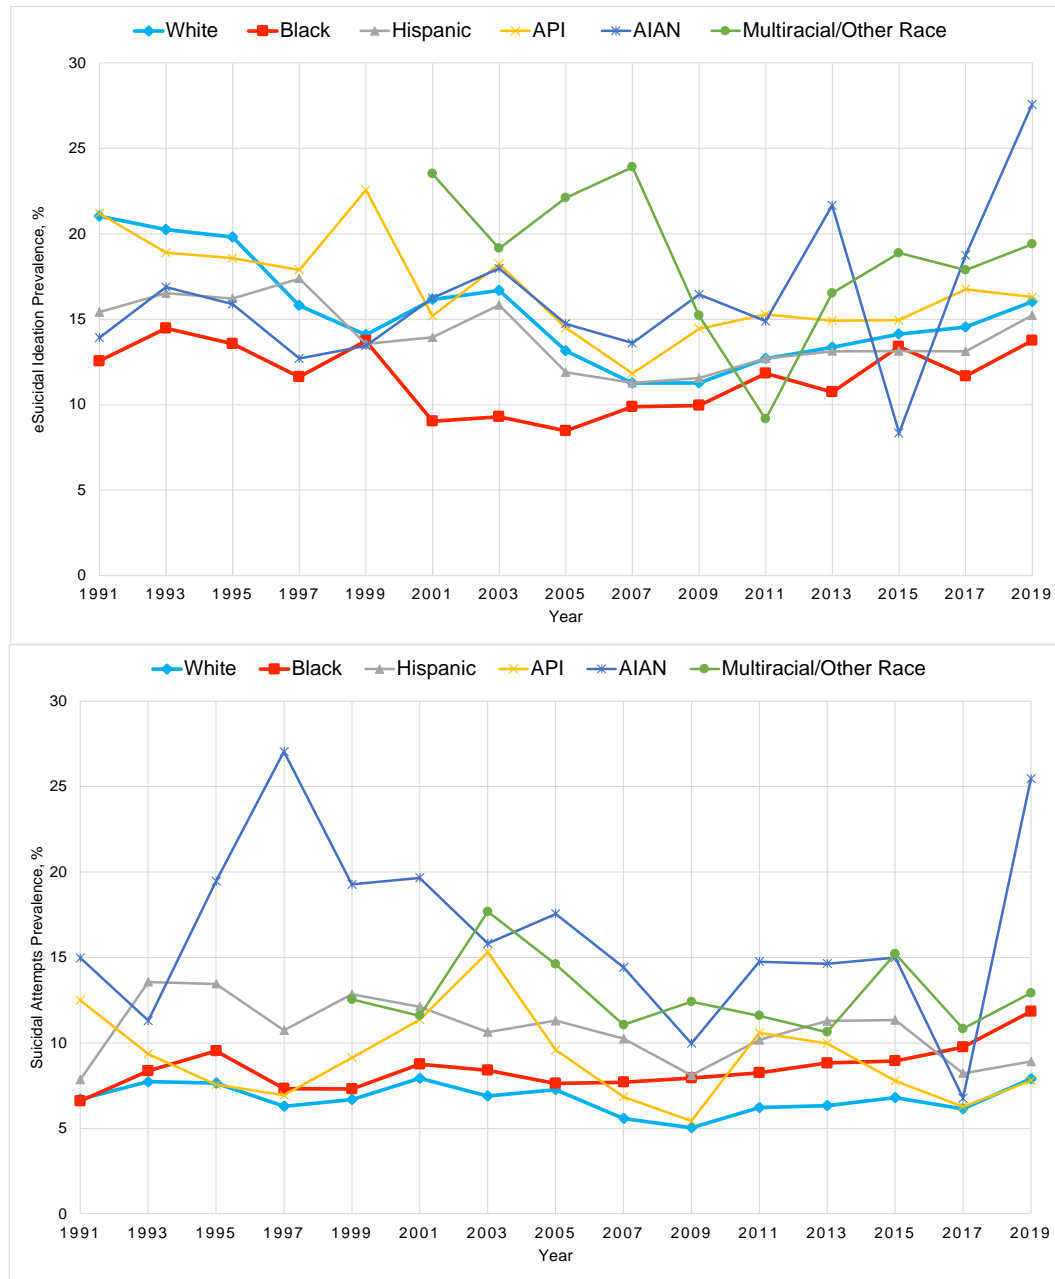

Note. For suicidal ideation, parallel comparisons were rejected when comparing White and Black adolescents ( $P=.01$ ), White and AI/AN adolescents ( $P=.02$ ),  
 © 2021 Xiao Y et al. JAMA Network Open.

Black and API adolescents ( $P=.02$ ), and Hispanic and AI/AN adolescents ( $P=.02$ ). For suicide attempts, APCs differed significantly between White and Black adolescents ( $P=.003$ ) and Black and Hispanic adolescents ( $P=.01$ ).

**eFigure 4.** Prevalence of Suicidal Ideation and Suicide Attempts among U.S. Adolescents, by Sex and Race/ethnicity, 1991-2019

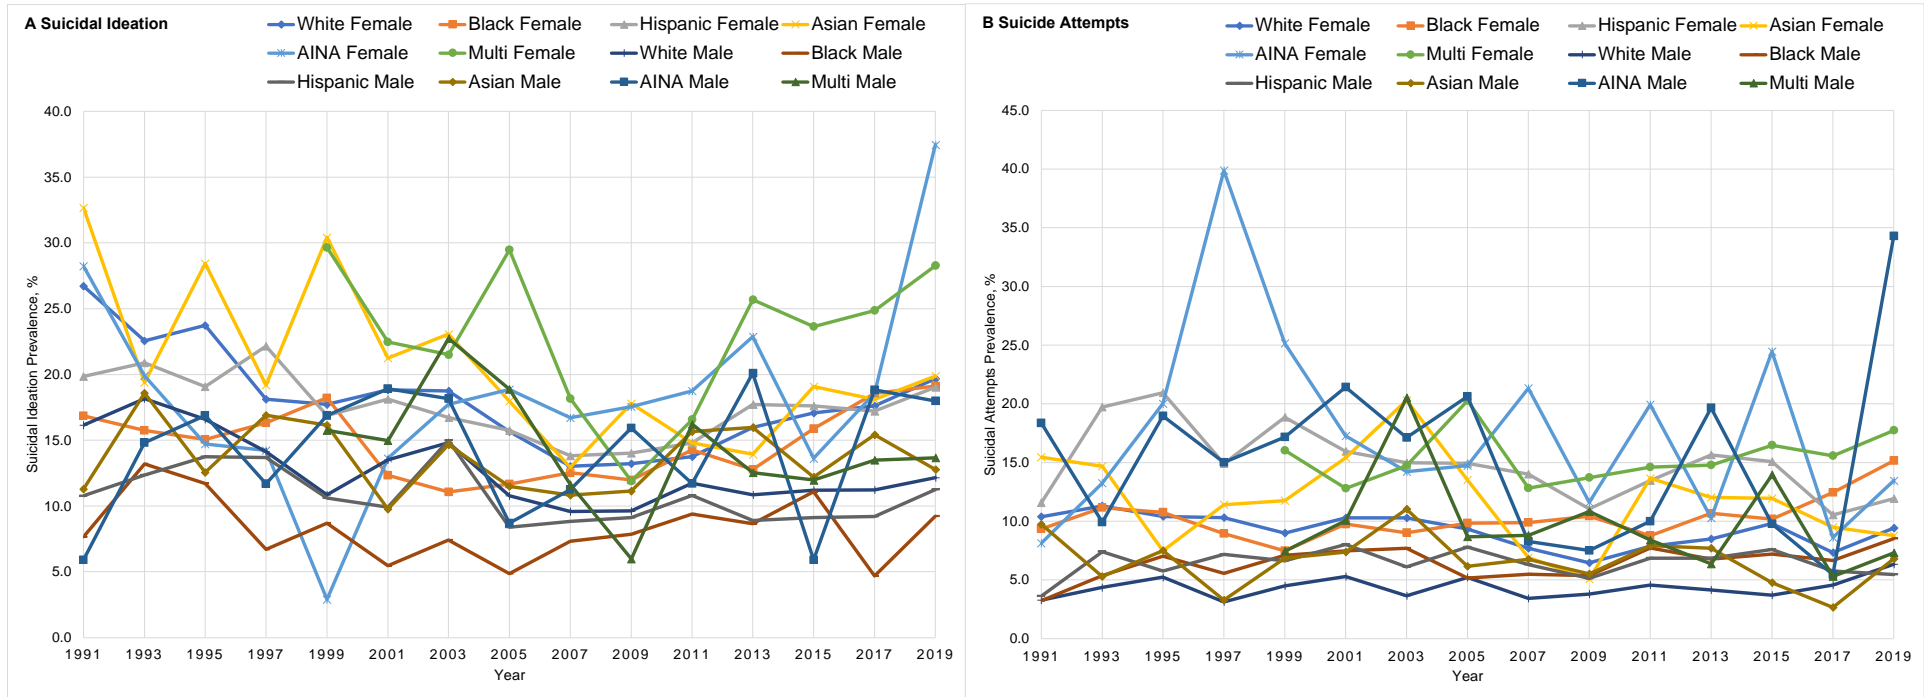

**eFigure 5.** Trends in Suicidal Ideation and Suicide Attempts among U.S. Adolescents, by Sex and Race/ethnicity, 1991-2019

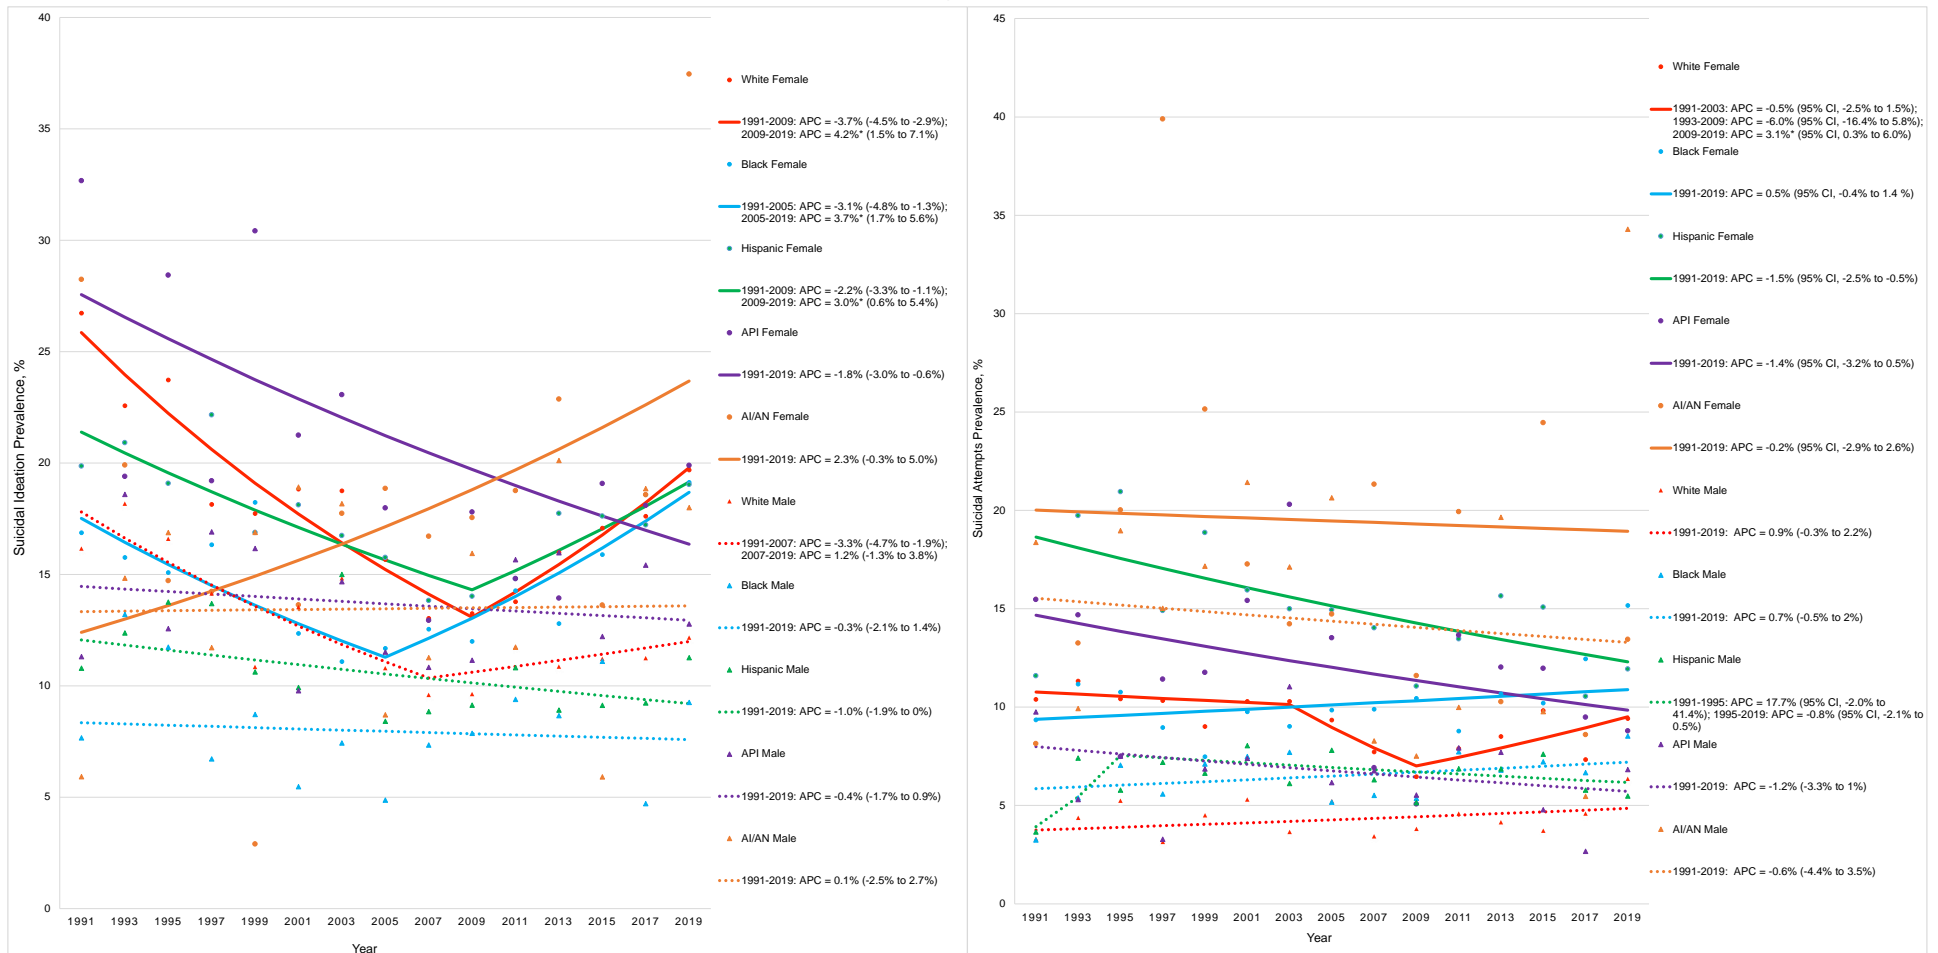

Note. For suicidal ideation, parallel comparisons were rejected when comparing White females vs. Black females ( $P=.02$ ), White females vs. API females ( $P=.04$ ), White females vs. AI/AN females ( $P=.03$ ), Black vs. API females ( $P=.003$ ), Black females vs. White males ( $P=.02$ ), Black females vs. Hispanic males ( $P=.01$ ), Hispanic female vs. AI/AN females ( $P=.01$ ), Hispanic female vs. White males ( $P=.01$ ), API female vs. AI/AN females ( $P=.02$ ), AI/AN female vs. Hispanic males ( $P=.01$ ), White males vs. Black males ( $P=.04$ ), and White males vs. API males ( $P=.03$ ), indicating different pairwise slopes. For suicide attempts, parallel comparisons were rejected when comparing White females vs. Black females ( $P=.02$ ), White females vs. White males ( $P=.02$ ), White females vs. Black males ( $P=.01$ ), White females vs. Hispanic males ( $P<.001$ ), Black females vs. Hispanic females ( $P=.001$ ), Black females vs. API females ( $P=.04$ ), Black females vs. Hispanic males ( $P=.01$ ), Hispanic female vs. White males ( $P=.01$ ), Hispanic female vs. Black males ( $P=.01$ ), Hispanic female vs. Hispanic males ( $P=.02$ ), and API female vs. Hispanic males ( $P=.04$ ), indicating the pairwise slopes were different. Results for non-Hispanic multiracial adolescents were not displayed due to missing values over time.
